# Supplementary material for: Intrinsic Disorder in the Human Spliceosomal Proteome
Source: PLoS Comput Biol. 2012 Aug 9;8(8):e1002641. doi: 10.1371/journal.pcbi.1002641 (PMC3415423; doi:10.1371/journal.pcbi.1002641)
Supplement: Table S2 — Compositionally biased regions of spliceosome proteins. (XLSX) [file pcbi.1002641.s009.xlsx]

## Sheet: Table S2
Table S2: Compositionally biased regions of spliceosome proteins.
Region type	Protein group	Protein	GI	Abundance	Region
RS-like	U1 snRNP	U1-70K	29568103	Abundant	181-437
RS-like	U1 snRNP	U1-A	4759156	Abundant	99-125
RS-like	U2 snRNP, SF3B	SF3b145	55749531	Abundant	316-339
RS-like	U2 snRNP-related	CHERP	119226260	Abundant	737-823
RS-like	U2 snRNP-related	SR140	122937227	Non-abundant	1-73
RS-like	U2 snRNP-related	SR140	122937227	Non-abundant	890-1016
RS-like	U2 snRNP-related	hPRP43	68509926	Abundant	73-108
RS-like	U11/U12	U11/U12-35K	13027642	Non-abundant	133-246
RS-like	U11/U12	U11/U12-48K	71143123	Non-abundant	273-339
RS-like	U11/U12	U2AF35K-related 2	2833266	Non-abundant	369-469
RS-like	U4/U6 disnRNP	U4/U6-90K	4758556	Abundant	73-134
RS-like	U5 snRNP	U5-100K	41327771	Abundant	11-67
RS-like	U4/U6.U5 trisnRNP	U4/U6.U5-65K	56550051	Abundant	1-46
RS-like	U4/U6.U5 trisnRNP	U4/U6.U5-27K	24307919	Abundant	1-65
RS-like	CBP	CAP20	19923387	Abundant	119-156
RS-like	EJC	Acinus	308153407	Non-abundant	160-229
RS-like	EJC	Acinus	308153407	Non-abundant	576-667
RS-like	EJC	Acinus	308153407	Non-abundant	1142-1295
RS-like	EJC	Y14	4826972	Abundant	152-174
RS-like	EJC	pinin	33356174	Non-abundant	551-717
RS-like	EJC	RNPS1	6857826	Non-abundant	21-158
RS-like	EJC	RNPS1	6857826	Non-abundant	239-305
RS-like	TREX	THOC5	259016156	Non-abundant	1-29
RS-like	step 2 factors	hPRP22	4826690	Abundant	176-230
RS-like	step 2 factors	hPRP16	17999539	Non-abundant	159-268
RS-like	SR	9G8	72534660	Abundant	121-233
RS-like	SR	SC35	47271443	Non-abundant	101-208
RS-like	SR	SF2/ASF	5902076	Abundant	196-247
RS-like	SR	SRp54	8134672	Non-abundant	246-373
RS-like	SR	SRp46	15055543	Non-abundant	99-282
RS-like	SR	SRp20	4506901	Non-abundant	98-160
RS-like	SR	SRp30c	4506903	Abundant	93-107
RS-like	SR	SRp30c	4506903	Abundant	187-211
RS-like	SR	SRp40	86991438	Non-abundant	181-272
RS-like	SR	SRp55	20127499	Non-abundant	71-107
RS-like	SR	SRp55	20127499	Non-abundant	183-344
RS-like	SR	SRp75	21361282	Non-abundant	71-101
RS-like	SR	SRp75	21361282	Non-abundant	177-494
RS-like	SR	hTra-2 alpha	9558733	Non-abundant	12-112
RS-like	SR	hTra-2 alpha	9558733	Non-abundant	232-282
RS-like	SR	hTra-2 beta	4759098	Abundant	12-106
RS-like	SR	SRp38	16905517	Abundant	106-253
RS-like	SRm160/300	SRM300	118572613	Non-abundant	251-2752
RS-like	hnRNP	hnRNPA3	34740329	Abundant	1-33
RS-like	hnRNP	hnRNPG-T	153252068	Non-abundant	173-217
RS-like	A complex	TRAP150	167234419	Abundant	7-55
RS-like	A complex	TRAP150	167234419	Abundant	119-190
RS-like	A complex	TRAP150	167234419	Abundant	191-331
RS-like	A complex	TRAP150	167234419	Abundant	374-408
RS-like	A complex	TRAP150	167234419	Abundant	737-789
RS-like	A complex	p68	4758138	Non-abundant	478-497
RS-like	A complex	TLS/FUS	544357	Non-abundant	1-165
RS-like	A complex	LUC7B1	41393554	Non-abundant	241-363
RS-like	A complex	RNPC2	10635692	Non-abundant	16-150
RS-like	A complex	C19orf43	13128992	Non-abundant	1-26
RS-like	B complex	hPRP4-Kinase	89276756	Non-abundant	128-394
RS-like	B complex	hPRP4-Kinase	89276756	Non-abundant	440-497
RS-like	B complex	PRPF38A	24762236	Abundant	213-309
RS-like	B complex	FBP21	6005948	Abundant	84-107
RS-like	B complex	CCDC55	14149807	Non-abundant	274-313
RS-like	B complex	PABP2	4758876	Non-abundant	260-306
RS-like	B-act complex	Cyp-60	47678627	Abundant	491-520
RS-like	B-act complex	hPRP17	7706657	Abundant	1-47
RS-like	B-act complex	KIAA1604	55749769	Abundant	11-108
RS-like	B-act complex	KIAA1604	55749769	Abundant	667-714
RS-like	C complex	Q9BRR8	21361684	Non-abundant	882-916
RS-like	C complex	SRCyp	42560244	Non-abundant	180-215
RS-like	C complex	SRCyp	42560244	Non-abundant	270-415
RS-like	C complex	SRCyp	42560244	Non-abundant	540-654
RS-like	C complex	HSPC220	7706557	Abundant	234-271
RS-like	C complex	NY-REN-24	126723149	Abundant	310-325
RS-like	C complex	FLJ20094	8923106	Non-abundant	110-181
RS-like	C complex	NFKBIL1	222352173	Non-abundant	1-31
RS-like	C complex	FLJ22626	168229156	Non-abundant	5-110
RS-like	C complex	FLJ22626	168229156	Non-abundant	169-269
RS-like	C complex	TTC14	33457330	Non-abundant	472-525
RS-like	C complex	FRA10AC1	24432067	Non-abundant	238-301
RS-like	pre-mRNA/mRNA-binding	LOC124245	255652953	Non-abundant	545-609
RS-like	pre-mRNA/mRNA-binding	LOC124245	255652953	Non-abundant	685-722
RS-like	pre-mRNA/mRNA-binding	DDX3	87196351	Non-abundant	22-145
RS-like	pre-mRNA/mRNA-binding	BCLAF1	7661958	Non-abundant	4-51
RS-like	pre-mRNA/mRNA-binding	BCLAF1	7661958	Non-abundant	109-153
RS-like	pre-mRNA/mRNA-binding	BCLAF1	7661958	Non-abundant	708-763
RS-like	pre-mRNA/mRNA-binding	RBM7	9994185	Non-abundant	86-140
RS-like	miscellaneous	TCERG1	21327715	Non-abundant	844-897
RS-like	miscellaneous	ZCCHC8	38044290	Non-abundant	404-465
RS-like	miscellaneous	OTT	47933339	Non-abundant	1-74
RS-like	miscellaneous	RBQ-1	33620769	Non-abundant	78-110
RS-like	miscellaneous	RBQ-1	33620769	Non-abundant	679-772
RS-like	miscellaneous	RBQ-1	33620769	Non-abundant	1693-1721
RS-like	miscellaneous	SON	21040326	Non-abundant	1820-2046
G-rich	Sm	Sm-B	4507125	Abundant	87-174
G-rich	Sm	Sm-D1	5902102	Abundant	98-114
G-rich	Sm	Sm-D3	4759160	Abundant	87-126
G-rich	Lsm	LSm4	6912486	Abundant	86-139
G-rich	U2 snRNP-related	hU2AF35	5803207	Abundant	184-240
G-rich	EJC	MLN51	15721939	Non-abundant	1-70
G-rich	EJC	Aly/REF	238776833	Non-abundant	1-104
G-rich	EJC	Aly/REF	238776833	Non-abundant	184-239
G-rich	SR	SF2/ASF	5902076	Abundant	94-117
G-rich	SR	SRp40	86991438	Non-abundant	75-103
G-rich	SR	hTra-2 beta	4759098	Abundant	198-288
G-rich	hnRNP	hnRNPA1	288558857	Abundant	182-372
G-rich	hnRNP	hnRNPA3	34740329	Abundant	214-378
G-rich	hnRNP	hnRNPAB	21757498	Abundant	241-332
G-rich	hnRNP	hnRNPD	14110420	Non-abundant	272-355
G-rich	hnRNP	hnRNPA0	5803036	Non-abundant	182-305
G-rich	hnRNP	hnRNPA2/B1	133257	Non-abundant	202-353
G-rich	hnRNP	hnRNPG	56699409	Non-abundant	218-391
G-rich	hnRNP	hnRNPG-T	153252068	Non-abundant	218-392
G-rich	hnRNP	RALY	8051631	Non-abundant	216-306
G-rich	hnRNP	hnRNPU	74136883	Abundant	694-824
G-rich	hnRNP	hnRNPR	5031755	Non-abundant	428-633
G-rich	hnRNP	hnRNPQ	228008291	Non-abundant	423-623
G-rich	hnRNP	hnRNPH1	5031753	Non-abundant	195-254
G-rich	hnRNP	hnRNPH1	5031753	Non-abundant	370-449
G-rich	hnRNP	hnRNPH2	9624998	Non-abundant	199-254
G-rich	hnRNP	hnRNPH2	9624998	Non-abundant	370-449
G-rich	hnRNP	hnRNPH3	14141157	Non-abundant	101-192
G-rich	hnRNP	hnRNPH3	14141157	Non-abundant	271-346
G-rich	A complex	TRAP150	167234419	Abundant	56-118
G-rich	A complex	p72	3122595	Non-abundant	1-48
G-rich	A complex	DDX9	100913206	Non-abundant	1151-1270
G-rich	A complex	TLS/FUS	544357	Non-abundant	166-283
G-rich	A complex	TLS/FUS	544357	Non-abundant	371-424
G-rich	A complex	TLS/FUS	544357	Non-abundant	454-526
G-rich	A complex	NFAR	24234750	Non-abundant	640-894
G-rich	pre-mRNA/mRNA-binding	DDX3	87196351	Non-abundant	582-662
G-rich	pre-mRNA/mRNA-binding	BCLAF1	7661958	Non-abundant	52-108
G-rich	pre-mRNA/mRNA-binding	NF45	24234747	Non-abundant	1-24
G-rich	miscellaneous	PSF	4826998	Non-abundant	1-30
G-rich	miscellaneous	OTT	47933339	Non-abundant	75-168
polyproline	Sm	Sm-B	4507125	Abundant	175-240
polyproline	U1 snRNP	U1-C	4507127	Abundant	57-159
polyproline	U2 snRNP, SF3A	SF3a120	5032087	Abundant	1-37
polyproline	U2 snRNP, SF3A	SF3a120	5032087	Abundant	350-379
polyproline	U2 snRNP, SF3A	SF3a120	5032087	Abundant	536-688
polyproline	U2 snRNP, SF3A	SF3a66	21361376	Abundant	214-464
polyproline	U2 snRNP, SF3B	SF3b145	55749531	Abundant	57-109
polyproline	U2 snRNP, SF3B	SF3b145	55749531	Abundant	180-244
polyproline	U2 snRNP, SF3B	SF3b49	5032069	Abundant	200-424
polyproline	U2 snRNP-related	CHERP	119226260	Abundant	344-681
polyproline	U2 snRNP-related	SR140	122937227	Non-abundant	357-414
polyproline	U11/U12	U11/U12-59K	22027541	Non-abundant	1-129
polyproline	hPrp19 / CDC5L	Npw38BP	7706501	Non-abundant	143-209
polyproline	hPrp19 / CDC5L	Npw38BP	7706501	Non-abundant	388-551
polyproline	hPrp19 / CDC5L-related	RBM22	8922328	Abundant	325-420
polyproline	EJC	MLN51	15721939	Non-abundant	360-703
polyproline	SRm160/300	SRM160	42542379	Non-abundant	125-850
polyproline	hnRNP	hnRNPC	117189975	Abundant	89-193
polyproline	hnRNP	hnRNPG	56699409	Non-abundant	86-172
polyproline	hnRNP	hnRNPG-T	153252068	Non-abundant	95-172
polyproline	hnRNP	hnRNPK	14165435	Non-abundant	219-384
polyproline	hnRNP	E1B-AP5	21536326	Non-abundant	41-196
polyproline	hnRNP	E1B-AP5	21536326	Non-abundant	597-856
polyproline	A complex	BBP	42544130	Non-abundant	330-637
polyproline	A complex	p72	3122595	Non-abundant	594-650
polyproline	A complex	NFAR	24234750	Non-abundant	593-639
polyproline	B-act complex	PRCC	40807447	Non-abundant	1-387
polyproline	pre-mRNA/mRNA-binding	LOC124245	255652953	Non-abundant	610-684
polyproline	miscellaneous	TCERG1	21327715	Non-abundant	1-132
polyproline	miscellaneous	TCERG1	21327715	Non-abundant	1075-1098
polyproline	miscellaneous	PSF	4826998	Non-abundant	31-292
polyproline	miscellaneous	OTT	47933339	Non-abundant	269-346
polyproline	miscellaneous	OTT	47933339	Non-abundant	538-640
polyproline	miscellaneous	RBQ-1	33620769	Non-abundant	337-635
polyproline	miscellaneous	SON	21040326	Non-abundant	340-483
polyproline	miscellaneous	SON	21040326	Non-abundant	1147-1262
polyglutamine	U2 snRNP, SF3A	SF3a120	5032087	Abundant	104-144
polyglutamine	U2 snRNP-related	CHERP	119226260	Abundant	283-343
polyglutamine	EJC	pinin	33356174	Non-abundant	468-550
polyglutamine	hnRNP	hnRNPU	74136883	Abundant	43-286
charged	U2 snRNP, SF3B	SF3b145	55749531	Abundant	371-424
charged	U2 snRNP-related	SR140	122937227	Non-abundant	681-833
charged	hPrp19 / CDC5L	CCAP2	116812573	Abundant	77-124
charged	hPrp19 / CDC5L	Npw38	74027255	Non-abundant	18-42
charged	hPrp19 / CDC5L	Npw38	74027255	Non-abundant	96-182
charged	hPrp19 / CDC5L	Npw38BP	7706501	Non-abundant	263-305
charged	EJC	Acinus	308153407	Non-abundant	1296-1341
charged	EJC	MLN51	15721939	Non-abundant	71-168
charged	TREX	THOC1	154448890	Non-abundant	190-230
charged	TREX	THOC1	154448890	Non-abundant	534-565
charged	step 2 factors	hPRP22	4826690	Abundant	231-259
charged	hnRNP	hnRNPC	117189975	Abundant	221-306
charged	hnRNP	hnRNPK	14165435	Non-abundant	1-41
charged	A complex	TRAP150	167234419	Abundant	441-517
charged	A complex	LUCA15	13124794	Abundant	21-71
charged	A complex	SPF31	112293277	Non-abundant	228-253
charged	A complex	HCNGP	9994179	Non-abundant	43-98
charged	A complex	NFAR	24234750	Non-abundant	50-81
charged	B complex	hPRP4-Kinase	89276756	Non-abundant	1-38
charged	B complex	TFIP11	8393259	Non-abundant	1-23
charged	B-act complex	hPRP2	255982614	Abundant	342-381
charged	C complex	Abstrakt	21071032	Abundant	1-32
charged	C complex	Q9BRR8	21361684	Non-abundant	1-27
charged	C complex	SRCyp	42560244	Non-abundant	416-539
charged	C complex	WDR70	8922301	Non-abundant	78-169
charged	pre-mRNA/mRNA-binding	NF45	24234747	Non-abundant	339-390
noncharged	U1 snRNP	U1-A	4759156	Abundant	126-197
noncharged	U2 snRNP, U2-A'/U2-B''	U2snRNP-B''	4507123	Abundant	121-150
noncharged	U2 snRNP-related	FBP-interacting repressor	17978512	Abundant	1-59
noncharged	U2 snRNP-related	hU2AF65	6005926	Abundant	231-257
noncharged	U2 snRNP-related	CHERP	119226260	Abundant	72-106
noncharged	U11/U12	U11/U12-20K	9506863	Non-abundant	125-170
noncharged	U11/U12	U11/U12-65K	40538732	Non-abundant	193-238
noncharged	U4/U6 disnRNP	U4/U6-90K	4758556	Abundant	165-194
noncharged	U5 snRNP	U5-102K	40807485	Abundant	196-235
noncharged	hPrp19 / CDC5L	CDC5L	11067747	Abundant	112-141
noncharged	hPrp19 / CDC5L	CCAP1	5729877	Non-abundant	613-646
noncharged	hPrp19 / CDC5L-related	SKIP	6912676	Abundant	201-244
noncharged	SR	SRp54	8134672	Non-abundant	1-31
noncharged	SR	hTra-2 alpha	9558733	Non-abundant	215-231
noncharged	hnRNP	hnRNPM	14141152	Non-abundant	148-203
noncharged	hnRNP	hnRNPM	14141152	Non-abundant	290-641
noncharged	A complex	SF4	33469964	Non-abundant	320-367
noncharged	A complex	LUCA15	13124794	Abundant	72-94
noncharged	A complex	BBP	42544130	Non-abundant	66-91
noncharged	A complex	RBM10	20127479	Non-abundant	243-307
noncharged	A complex	FBP11	151301228	Non-abundant	1-116
noncharged	A complex	RED120/S164	55741709	Non-abundant	1-60
noncharged	A complex	p68	4758138	Non-abundant	584-614
noncharged	A complex	p72	3122595	Non-abundant	476-593
noncharged	A complex	TIA1	77695912	Non-abundant	295-392
noncharged	A complex	ZNF207	4508017	Non-abundant	128-264
noncharged	A complex	ZNF207	4508017	Non-abundant	387-478
noncharged	A complex	NFAR	24234750	Non-abundant	337-398
noncharged	A complex	NFAR	24234750	Non-abundant	470-517
noncharged	A complex	C19orf43	13128992	Non-abundant	83-111
noncharged	A complex	CCAR1	46852388	Abundant	120-146
noncharged	B complex	hPRP4-Kinase	89276756	Non-abundant	39-81
noncharged	B complex	RBM4	93277122	Non-abundant	251-364
noncharged	B complex	DnaJ homolog	7662146	Non-abundant	465-496
noncharged	B complex	DnaJ homolog	7662146	Non-abundant	710-744
noncharged	B complex	PABP2	4758876	Non-abundant	60-117
noncharged	B complex	hsp27	4504517	Non-abundant	186-205
noncharged	C complex	Q9BRR8	21361684	Non-abundant	250-283
noncharged	C complex	NY-REN-24	126723149	Abundant	421-469
noncharged	C complex	JUP	12056468	Non-abundant	673-745
noncharged	C complex	FLJ22626	168229156	Non-abundant	140-168
noncharged	C complex	LENG1	24308289	Non-abundant	124-146
noncharged	pre-mRNA/mRNA-binding	LOC124245	255652953	Non-abundant	770-807
noncharged	pre-mRNA/mRNA-binding	YB-1	34098946	Abundant	1-53
noncharged	pre-mRNA/mRNA-binding	ASR2B	58331218	Abundant	758-876
noncharged	miscellaneous	TCERG1	21327715	Non-abundant	178-258
noncharged	miscellaneous	TCERG1	21327715	Non-abundant	259-427
noncharged	miscellaneous	ZCCHC8	38044290	Non-abundant	466-501
noncharged	miscellaneous	matrin3	11968019	Non-abundant	1-48
noncharged	miscellaneous	PSF	4826998	Non-abundant	601-707
noncharged	miscellaneous	RBM42	21359951	Non-abundant	1-29
