# Supplementary material for: Intrinsic Disorder in the Human Spliceosomal Proteome
Source: PLoS Comput Biol. 2012 Aug 9;8(8):e1002641. doi: 10.1371/journal.pcbi.1002641 (PMC3415423; doi:10.1371/journal.pcbi.1002641)
Supplement: Table S4 — PFAM domains that map to disordered regions in human spliceosomal proteins. (XLSX) [file pcbi.1002641.s011.xlsx]

## Sheet: Table S4
Table S4: PFAM domains that map to disordered regions in human spliceosomal proteins.
PFAM domain	Number of copies	Proteins	Protein group	Predicted presence in LECA	Protein abundance	Note
LUC7	1	LUC7B1	A-complex	LECA	Non-abundant	zinc finger (*)
P68HR	2	p68	A-complex		Non-abundant
PRCC_Cterm	1	PRCC	B-act complex	LECA	Non-abundant
CWC25	1	CCDC49	B-complex	LECA	Non-abundant
DUF2040	1	CCDC55	B-complex	LECA	Non-abundant
MFAP1_C	1	MFAP1	B-complex	LECA	Abundant
RED_C	1	RED	B-complex	LECA	Abundant
RED_N	1	RED	B-complex	LECA	Abundant
SMC_N	1	Prp38b	B-complex	LECA	Non-abundant
TIP_N	1	TFIP11	B-complex	LECA	Non-abundant
Cactin_mid	1	NY-REN-24	C-complex	LECA	Abundant
DUF1754	1	DKFZP586O0120	C-complex	LECA	Non-abundant
DUF572	1	CCDC130	C-complex	LECA	Non-abundant
Es2	1	DGCR14	C-complex	LECA	Non-abundant
Hep_59	1	HSPC220	C-complex	LECA	Abundant
SYF2	1	GCIP p29	C-complex	LECA	Abundant
SynMuv_product	1	FLJ22626	C-complex	LECA	Non-abundant
Btz	1	MLN51	EJC	LECA	Non-abundant	found in experimental structure
Pinin_SDK_memA	1	pinin	EJC	LECA	Non-abundant
Pinin_SDK_N	1	pinin	EJC		Non-abundant
CBFNT	2	hnRNP AB, hnRNP D	hnRNP		Abundant
HnRNP_M	1	hnRNP M	hnRNP		Non-abundant
HnRNPA1	3	hnRNP A1, hnRNP A0, hnRNP A2/B1	hnRNP		Abundant
RBM1CTR	2	hnRNP G, hnRNP G-T	hnRNP		Non-abundant
ROKNT	1	hnRNP K	hnRNP		Non-abundant
Cwf_Cwc_15	1	CCAP2	hPrp19 / CDC5	LECA	Abundant
DUF3351	1	CDC5L	hPrp19 / CDC5	LECA	Abundant
THOC7	1	SPF27	hPrp19 / CDC5	LECA	Abundant
Wbp11	1	Npw38BP	hPrp19 / CDC5	LECA	Non-abundant
SKIP_SNW	1	SKIP	hPrp19 / CDC5-related	LECA	Abundant
NOPS	1	PSF	miscellaneous		Non-abundant
ARS2	1	ASR2B	pre-mRNA/mRNA-binding	LECA	Abundant	zinc finger (*)
Bud13	1	MGC13125	RES	LECA	Non-abundant
DUF3449	1	SF3a60	SF3A	LECA	Abundant	zinc finger (*)
PRP21_like_P	1	SF3a120	SF3A	LECA	Abundant	zinc finger (*)
DUF382	1	SF3b145	SF3B	LECA	Abundant
SF3b1	1	SF3b155	SF3B	LECA	Abundant	found in experimental structure
Slu7	1	hSlu7	step 2 factors	LECA	Abundant
efThoc1	1	THOC1	TREX	LECA	Non-abundant
FimP	1	THOC5	TREX	LECA	Non-abundant
U1snRNP70_N	1	U1-70K	U1	LECA	Abundant	found in experimental structure
PRP3	1	U4/U6-90K	U4/U6	LECA	Abundant
Prp31_C	1	U4/U6-61K	U4/U6	LECA	Abundant
DUF1777	1	U4/U6.U5-27K	U4/U6.U5	LECA	Abundant
SART-1	1	U4/U6.U5-110K	U4/U6.U5	LECA	Abundant
PRP1_N	1	U5-102K	U5	LECA	Abundant
Footnote:
(*) (Korneta et al., 2012)
