# Supplementary material for: Intrinsic Disorder in the Human Spliceosomal Proteome
Source: PLoS Comput Biol. 2012 Aug 9;8(8):e1002641. doi: 10.1371/journal.pcbi.1002641 (PMC3415423; doi:10.1371/journal.pcbi.1002641)
Supplement: Table S5 — Conserved ordered regions in the core of the human spliceosome. (XLSX) [file pcbi.1002641.s012.xlsx]

## Sheet: Table S5
Table S5: Conserved ordered regions in the core of the human spliceosome.
Region (ordered PFAM domain)	Protein	Found in Giardia lamblia?	Ancestral? (*)	Phylogenetic distribution (**)	Similar regions	Reference (PubMed ID/other)
LSM	Sm/Lsm proteins (14 proteins)	Y	Y	ABE	Lsm1 - histone mRNA degradation; bacterial Hfq - RNA/protein biogenesis; archaeal Sm - Rnase P association	18172165, 19282982
Ribosomal_L7Ae	U4/U6-15.5K (hSnu13)	Y	N	AE	hSnu13 - box C/D snoRNP biogenesis in archaea and eukaryotes	17412961
Nop+NOSIC	U4/U6-61K (hPrp31)	N	Y	AE	Nop56/58 - box C/D snoRNP biogenesis in archaea and eukaryotes	17412961
WD40 repeats	U4/U6-60K (hPrp4)	N	N	ABE	multiple WD40 repeat proteins	PFAM
Pro_isomerase	U4/U6-20K (PPIH)	N	N	ABE	multiple protline isomerases	PFAM
GTP_EFTU+GTP_EFTU_D2+EFG_IV+EFG_C	U5-116K (EFTUD2, hSnu114)	Y/N (***)		ABE	EEF2 - elongation factor 2 in eukaryotes; EF-2/EF-G in bacteria; EF-2 in archaea	16885028
(DEAD+Helicase_C+Sec63)x2	U5-200K (hBrr2)	Y	Y	AE	Brr2 helicase in archaea	sequence similarity
PRO8NT+PROCN	U5-220K (hPrp8)	Y	Y	E
RRM_4+U5_2-snRNA_bdg	U5-220K (hPrp8)	Y	Y	BE	group II intron-encoded maturase reverse transcriptase and domain X domains - group II intron maturation	21441348
PRP8_domainIV	U5-220K (hPrp8)	Y	Y	ABE	multiple Rnase H fold domains	18836455
JAB+PROCT	U5-220K (hPrp8)	Y	Y	ABE	multiple Jab/MNP/PAD domains	10369758
DEAD+Helicase_C	U5-100K (hPrp28, DDX23)	N	Y	ABE	multiple helicase proteins	PFAM
DIM1	U5-15K (hDib1)	Y	Y	ABE	multiple thioredoxin proteins	PFAM
TPR	U5-102K	N	N	ABE	multiple TPR repeat proteins	PFAM
WD40	U5-40K	N	N	ABE	multiple WD40 repeat proteins	PFAM
shared C-terminal architecture: DEAD+Helicase_C+HA2+DUF1605	hPrp2, hPrp22, hPrp16, hPrp43	Y	Y	BE	HrpA in bacteria; Dhr1/Dhr2 - nucleolar, associated with box C/D U3 in yeast	10982841, 7899078
Footnotes:
(*) Reported in (Collins, Penny, 2005).
(**) Taxa where given PFAM domains are widespread. A=Archaea; B=Bacteria; E=Eukaryota.
(***) GI referring to a now outdated assembly of the genome reported in (Collins, Penny, 2005).
